# Supplementary material for: Evaluation of Mehlich-3 as a Multi-Element Extractant of Micronutrients and Sulfur in a Soil–Ryegrass System Amended with Varying Biochar Rates from Two Feedstocks
Source: MDPI journal article supplement (doi:10.3390/land11111979), 2022-11-04
Supplement: s1 [file s1]

**Supplementary Table S1.** Pearson correlations between DTPA-extractable Zn, Fe, Cu, Mn, B, and Monocalcium phosphate (MCP)-extractable S with nutrient concentrations in ryegrass shoots and roots.

| Biochar      | Shoots              | Roots               | Shoots+Roots        |
|--------------|---------------------|---------------------|---------------------|
| .....Zn..... |                     |                     |                     |
| SGB          | 0.73**              | 0.83**              | 0.85***             |
| PLB          | 0.54 <sup>NS</sup>  | 0.68**              | 0.79**              |
| SGB+PLB      | 0.46*               | 0.71***             | 0.74***             |
| .....Fe..... |                     |                     |                     |
| SGB          | 0.37 <sup>NS</sup>  | 0.60*               | 0.58 <sup>NS</sup>  |
| PLB          | 0.17 <sup>NS</sup>  | 0.43 <sup>NS</sup>  | 0.46 <sup>NS</sup>  |
| SGB+PLB      | 0.34 <sup>NS</sup>  | 0.44*               | 0.44*               |
| .....Cu..... |                     |                     |                     |
| SGB          | -0.33 <sup>NS</sup> | -0.20 <sup>NS</sup> | -0.28 <sup>NS</sup> |
| PLB          | -0.46 <sup>NS</sup> | -0.45 <sup>NS</sup> | -0.41 <sup>NS</sup> |
| SGB+PLB      | -0.33 <sup>NS</sup> | -0.22 <sup>NS</sup> | -0.26 <sup>NS</sup> |
| .....Mn..... |                     |                     |                     |
| SGB          | -0.20 <sup>NS</sup> | 0.69**              | 0.55*               |
| PLB          | -0.76***            | -0.64**             | -0.74**             |
| SGB+PLB      | -0.31 <sup>NS</sup> | -0.06 <sup>NS</sup> | -0.18 <sup>NS</sup> |
| .....B.....  |                     |                     |                     |
| SGB          | -0.37 <sup>NS</sup> | 0.57*               | 0.39 <sup>NS</sup>  |
| PLB          | 0.07 <sup>NS</sup>  | 0.88***             | 0.90***             |
| SGB+PLB      | 0.48*               | 0.78***             | 0.86***             |
| .....S.....  |                     |                     |                     |
| SGB          | 0.93***             | 0.89***             | 0.94***             |
| PLB          | 0.89***             | 0.33 <sup>NS</sup>  | 0.83***             |
| SGB+PLB      | 0.73***             | 0.75***             | 0.81***             |

\*\*\*:  $p < 0.001$ ; \*\*:  $p < 0.01$ ; \*:  $p < 0.05$ ; NS: non-significant ( $p > 0.05$ ).

SGB and PLB are switchgrass- and poultry litter-derived biochars pyrolyzed at 700 °C, respectively; SGB+PLB: the soils treated with SGB and the soils treated with PLB are compiled together in the analyses.
